# Supplementary material for: Human endothelial cells secrete neurotropic factors to direct axonal growth of peripheral nerves
Source: PubMed Central journal article supplement (PMC5481420; doi:10.1038/s41598-017-04460-8), 2017-06-22
Supplement: 41598_2017_4460_MOESM1_ESM.pdf [file 41598_2017_4460_MOESM1_ESM.pdf]

**SUPPLEMENTAL INFORMATION**

**Human endothelial cells secrete neurotropic factors to direct axonal growth of peripheral nerves**

Jonathan M. Grasman and David L. Kaplan\*

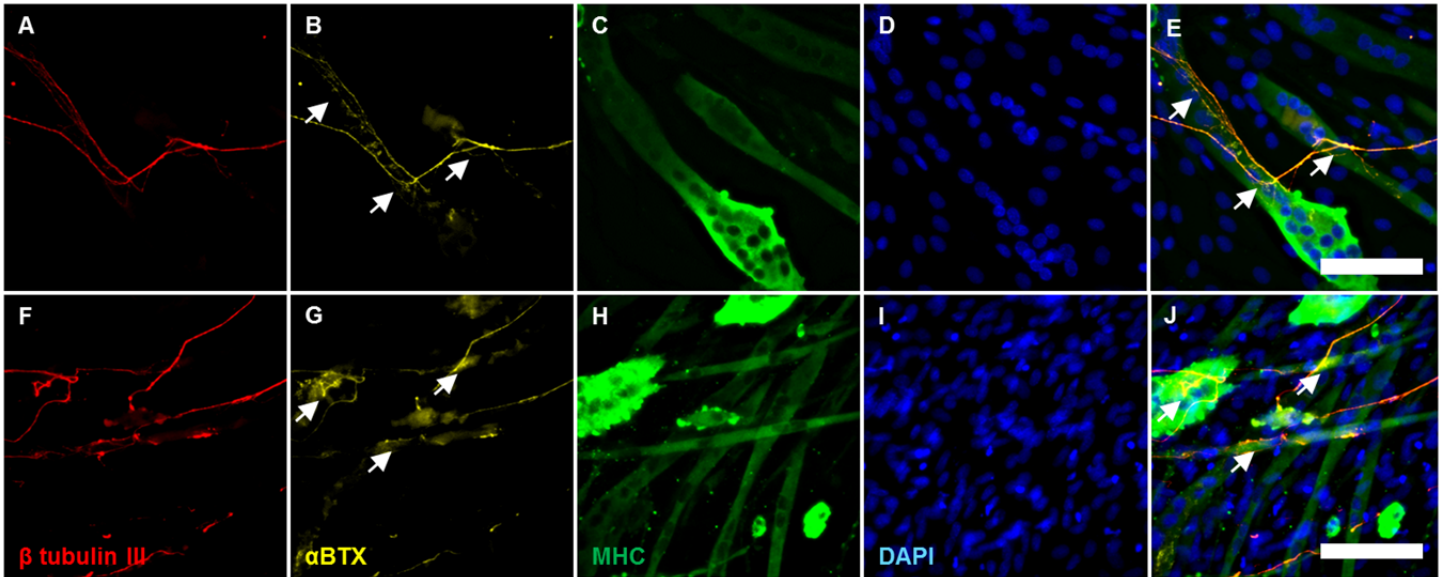

**Supplemental Figure S1.** Co-culture of myoblasts and chick DRGs developed neuromuscular junction structures. DRGs were seeded onto confluent myoblasts in differentiation medium and after 4 days co-localized  $\alpha$ -bungarotoxin ( $\alpha$ BTX), a marker for nicotinic acetylcholine receptors, along both neurons and myotubes. Arrows indicate regions of staining on myoblasts that appear to be neuromuscular junctions. Scale = 50  $\mu$ m.

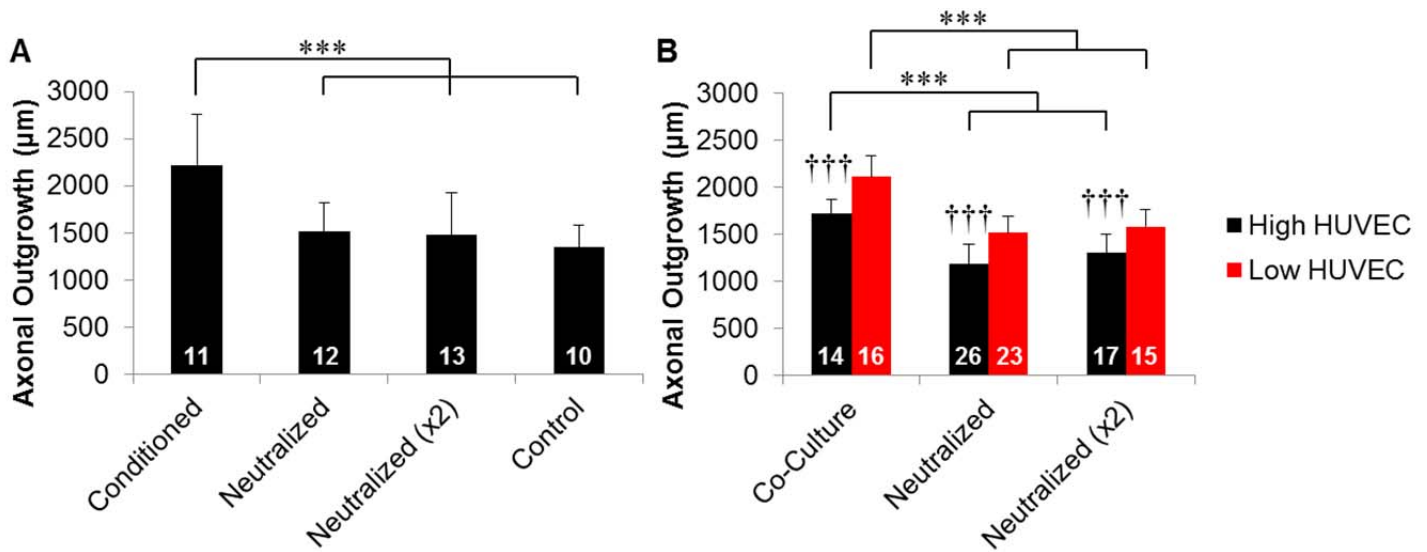

**Supplemental Figure S2.** Higher concentrations of BDNF neutralizing antibody do not affect axonal outgrowth. DRGs grown in (A) HUVEC-conditioned medium and (B) direct co-culture were cultured with neutralization antibody as described in the manuscript (125 ng/mL) or with twice the concentration of antibody (250 ng/mL). Enhanced neutralization did not lower axonal outgrowth with respect to normal neutralized conditions or the control (DRGs grown in monoculture). Data are presented as mean  $\pm$  standard error. \*\*\* ( $p < 0.001$ ) and brackets indicate significance from other treatments as determined by one-way ANOVA with Holm-Sidak post hoc analysis and ††† ( $p < 0.001$ ) indicates significance with low density HUVECs as determined by two-tailed Student's t-test (DRG sample size for each group shown in bars from 2 independent replicates).
